# Supplementary material for: β-Glucosidase activity and antimicrobial properties of potentially probiotic autochthonous lactic cultures
Source: PeerJ. 2023 Oct 6;11:e16094. doi: 10.7717/peerj.16094 (PMC10561641; doi:10.7717/peerj.16094)
Supplement: Supplemental Information 2 — The lactic cultures that showed intracellular and extracellular production of β-glucosidase. The sizes of the inhibitory halos that the cultures presented against the pathogens. [file peerj-11-16094-s002.xlsx]

## Sheet: Beta-Glucosidase
β - glucosidase activity
Samples	Replica	Intracellular		Extracellular
		Enzyme Activity	Enzyme concentration	Enzyme Activity	Enzyme concentration
CNPC 001	1	0.0869704236610711	0.0173940847322142	0	0
CNPC 001	2	0.0765787370103917	0.0153157474020783	0	0
CNPC 001	3	0.0837729816147082	0.0167545963229416	0	0
CNPC 002	1	0.0757793764988009	0.0151558752997602	0	0
CNPC 002	2	0.0757793764988009	0.0151558752997602	0	0
CNPC 002	3	0.0773780975219824	0.0154756195043965	0	0
CNPC 003	1	0.0821742605915268	0.0164348521183054	0	0
CNPC 003	2	0.108553157474021	0.0217106314948042	0	0
CNPC 003	3	0.0901678657074341	0.0180335731414868	0	0
CNPC 004	1	0.0829736211031175	0.0165947242206235	0	0
CNPC 004	2	0.0829736211031175	0.0165947242206235	0	0
CNPC 004	3	0.0829736211031175	0.0165947242206235	0	0
CNPC 007	1	0.0829736211031175	0.0165947242206235	0	0
CNPC 007	2	0.0797761790567546	0.0159552358113509	0	0
CNPC 007	3	0.0829736211031175	0.0165947242206235	0	0
EM 1107	1	0.0821742605915268	0.0164348521183054	0.081374900079936	0.0162749800159872
EM 1107	2	0.0829736211031175	0.0165947242206235	0.0821742605915268	0.0164348521183054
EM 1107	3	0.0837729816147082	0.0167545963229416	0.0821742605915268	0.0164348521183054
CNPC020	1	0	0	0	0
CNPC020	2	0	0	0	0
CNPC020	3	0	0	0	0
Antimicrobian activity

## Sheet: Antimicrobial 
Samples	Salmonella spp.		E. coli		S. aureus
	halo of inhibition (cm)	Inhibition percentage (%)	halo of inhibition (cm)	Inhibition percentage (%)	halo of inhibition (cm)	Inhibition percentage (%)
CNPC 001	0.9	0	1.2	104.348	0.9	0
CNPC 001	0.9	0	1.1	95.6522	1.4	95.6522
CNPC 002	0.9	0	1.1	95.6522	1.1	95.6522
CNPC 002	0.9	0	0.9	0	1.4	0
CNPC 003	0.9	0	0.9	0	0.9	0
CNPC 003	0.9	0	0.9	0	1.2	0
CNPC 004	1.1	55	1.15	100	1.2	100
CNPC 004	1.1	55	0.9	78.2609	1.2	78.2609
CNPC 007	1.19	59.5	1.2	104.348	1.2	104.348
CNPC 007	1.1	55	0.9	0	1.2	0
CNPC020	1.1	55	1.2	104.348	1.1	104.348
CNPC020	1.2	60	1.1	95.6522	1.35	95.6522
EM 1107	0.9	45	1.12	97.3913	1.1	97.3913
EM 1107	1.2	60	0.9	0	1.1	0
Ciprofloxacin Positive Control (liquid)	2	100	1.15	100	2.3	100
Ciprofloxacin Positive Control (liquid)	2.2	100	1.15	100	2.3	100
Ciprofloxacin Positive Control (disc)	2		1.4		1.2
Ciprofloxacin Positive Control (disc)	1.9		1.4		1.5

## Sheet: P values Intracel
		Analysis of Variance (INTRACELLULAR B-GLICOSIDASE)
		Marked effects are significant at p < .05000
		SS	df	MS	SS	df	MS	F	p
	Variable	Effect	Effect	Effect	Error	Error	Error
	Enzymatic activity	0.0183495686797218	6	0.0030582614466203	0.000432374590601965	14	3.08839e-05	99.0245	1.18432e-10
	Enzymatic concentration	0.000733983	6	0.00012233	1.7295e-05	14	1.23536e-06	99.0245	1.18432e-10
		LSD Test; Variable: ENZYMATIC ACTIVITY (INTRACELLULAR B-GLICOSIDASE)
		Marked differences are significant at p < ,05000
		{1}	{2}	{3}	{4}	{5}	{6}	{7}
	Cultures	M=,08244	M=,07631	M=,09363	M=,08297	M=,08191	M=,08297	M=0,0000
	CNPC 001 {1}		0.19825	0.0271761	0.908176	0.908176	0.908176	3.93664e-11
	CNPC 002 {2}	0.19825		0.00188668	0.164197	0.23782	0.164197	1.11039e-10
	CNPC 003 {3}	0.0271761	0.00188668		0.034036	0.0216502	0.034036	7.03678e-12
	CNPC 004 {4}	0.908176	0.164197	0.034036		0.817696	1	3.6094e-11
	CNPC 007 {5}	0.908176	0.23782	0.0216502	0.817696		0.817696	4.29578e-11
	EM 1107 {6}	0.908176	0.164197	0.034036	1	0.817696		3.6094e-11
	CNPC 020 {7}	3.93664e-11	1.11039e-10	7.03678e-12	3.6094e-11	4.29578e-11	3.6094e-11
		LSD Test; Variable: ENZYMATIC CONCENTRATION (INTRACELLULAR B-GLICOSIDASE)
		Marked differences are significant at p < ,05000
		{1}	{2}	{3}	{4}	{5}	{6}	{7}
	Cultures	M=,01649	M=,01526	M=,01873	M=,01659	M=,01638	M=,01659	M=0,0000
	CNPC 001 {1}		0.19825	0.0271761	0.908176	0.908176	0.908176	3.93664e-11
	CNPC 002 {2}	0.19825		0.00188668	0.164197	0.23782	0.164197	1.11039e-10
	CNPC 003 {3}	0.0271761	0.00188668		0.034036	0.0216502	0.034036	7.03678e-12
	CNPC 004 {4}	0.908176	0.164197	0.034036		0.817696	1	3.6094e-11
	CNPC 007 {5}	0.908176	0.23782	0.0216502	0.817696		0.817696	4.29578e-11
	EM 1107 {6}	0.908176	0.164197	0.034036	1	0.817696		3.6094e-11
	CNPC 020 {7}	3.93664e-11	1.11039e-10	7.03678e-12	3.6094e-11	4.29578e-11	3.6094e-11

## Sheet: P values extracel
			Analysis of Variance (INTRACELLULAR B-GLICOSIDASE)
			Marked effects are significant at p < ,05000
			SS	df	MS	SS	df	MS	F	p
		Variable	Effect	Effect	Effect	Error	Error	Error
		Enzymatic activity	0.0172514	6	0.00287524	4.25985e-07	14	3.04275e-08	94494.8	0
		Enzymatic concentration	0.000690057	6	0.00011501	1.70394e-08	14	1.2171e-09	94494.8	0
			LSD Test; Variable: ENZYMATIC ACTIVITY (EXTRACELLULAR)
			Marked differences are significant at p < ,05000
			{1}	{2}	{3}	{4}	{5}	{6}	{7}
		Cultures	M=0,0000	M=0,0000	M=0,0000	M=0,0000	M=0,0000	M=,08191	M=0,0000
		CNPC 001 {1}		1	1	1	1	0	1
		CNPC 002 {2}	1		1	1	1	0	1
		CNPC 003 {3}	1	1		1	1	0	1
		CNPC 004 {4}	1	1	1		1	0	1
		CNPC 007 {5}	1	1	1	1		0	1
		EM 1107 {6}	0	0	0	0	0		0
		CNPC 020 {7}	1	1	1	1	1	0
			LSD Test; Variable: ENZYMATIC CONCENTRATION (EXTRACELLULAR)
			Marked differences are significant at p < ,05000
			{1}	{2}	{3}	{4}	{5}	{6}	{7}
		Cultures	M=0,0000	M=0,0000	M=0,0000	M=0,0000	M=0,0000	M=,01638	M=0,0000
		CNPC 001 {1}		1	1	1	1	0	1
		CNPC 002 {2}	1		1	1	1	0	1
		CNPC 003 {3}	1	1		1	1	0	1
		CNPC 004 {4}	1	1	1		1	0	1
		CNPC 007 {5}	1	1	1	1		0	1
		EM 1107 {6}	0	0	0	0	0		0
		CNPC 020 {7}	1	1	1	1	1	0

## Sheet: P values Zones
		Analysis of Variance (INHIBITION ZONES)
		Marked effects are significant at p < ,05000
		SS	df	MS	SS	df	MS	F	p
	Variable	Effect	Effect	Effect	Error	Error	Error
	SALMONELLA	3.55204	8	0.444006	0.05405	9	0.00600556	73.9325	2.66091e-07
	SAUREUS	1.8861	8	0.235762	0.8823	9	0.0980333	2.40492	0.10652
	ECOLI	0.722344	8	0.0902931	0.1917	9	0.0213	4.23911	0.0226097
		LSD Test; Variable: SALMONELLA (INHIBITION ZONES)
		Marked differences are significant at p < ,05000
		{1}	{2}	{3}	{4}	{5}	{6}	{7}	{8}	{9}
		M=0,0000	M=0,0000	M=0,0000	M=,20000	M=,24500	M=,25000	M=,15000	M=1,0000	M=1,3000
	CNPC001 {1}		1	1	0.0296579	0.0115229	0.0103891	0.0849071	4.13811e-07	4.25526e-08
	CNPC002 {2}	1		1	0.0296579	0.0115229	0.0103891	0.0849071	4.13811e-07	4.25526e-08
	CNPC003 {3}	1	1		0.0296579	0.0115229	0.0103891	0.0849071	4.13811e-07	4.25526e-08
	CNPC004 {4}	0.0296579	0.0296579	0.0296579		0.575706	0.534898	0.534898	2.74425e-06	1.82038e-07
	CNPC007 {5}	0.0115229	0.0115229	0.0115229	0.575706		0.949967	0.251353	4.44413e-06	2.61103e-07
	CNPC020 {6}	0.0103891	0.0103891	0.0103891	0.534898	0.949967		0.229077	4.69567e-06	2.72016e-07
	EM1107 {7}	0.0849071	0.0849071	0.0849071	0.534898	0.251353	0.229077		1.64949e-06	1.23849e-07
	Positive control liquid {8}	4.13811e-07	4.13811e-07	4.13811e-07	2.74425e-06	4.44413e-06	4.69567e-06	1.64949e-06		0.00378188
	Positive control disc {9}	4.25526e-08	4.25526e-08	4.25526e-08	1.82038e-07	2.61103e-07	2.72016e-07	1.23849e-07	0.00378188
		LSD Test; Variable: ECOLI (INHIBITION ZONES)
		Marked differences are significant at p < ,05000
		{1}	{2}	{3}	{4}	{5}	{6}	{7}	{8}	{9}
		M=,25000	M=,10000	M=0,0000	M=,12500	M=,15000	M=,25000	M=,11000	M=,42500	M=,70000
	CNPC001 {1}		0.330881	0.120869	0.413951	0.510485	1	0.362485	0.261113	0.0130691
	CNPC002 {2}	0.330881		0.510485	0.86778	0.739769	0.330881	0.946871	0.0529673	0.00263256
	CNPC003 {3}	0.120869	0.510485		0.413951	0.330881	0.120869	0.470283	0.0172535	0.000978727
	CNPC004 {4}	0.413951	0.86778	0.413951		0.86778	0.413951	0.920393	0.0699806	0.00340681
	CNPC007 {5}	0.510485	0.739769	0.330881	0.86778		0.510485	0.790213	0.092176	0.00442641
	CNPC020 {6}	1	0.330881	0.120869	0.413951	0.510485		0.362485	0.261113	0.0130691
	EM1107 {7}	0.362485	0.946871	0.470283	0.920393	0.790213	0.362485		0.0592269	0.00291712
	Positive control liquid {8}	0.261113	0.0529673	0.0172535	0.0699806	0.092176	0.261113	0.0592269		0.092176
	Positive control disc {9}	0.0130691	0.00263256	0.000978727	0.00340681	0.00442641	0.0130691	0.00291712	0.092176

## Sheet: P values % inhib
		Analysis of Variance (% INHIBITION)
		Marked effects are significant at p < ,05000
		SS	df	MS	SS	df	MS	F	p
		Effect	Effect	Effect	Error	Error	Error
	SALMONELLA	1166.81	6	194.468	388.663	7	55.5232	3.50246	0.062827
	SAUREUS	3729.71	6	621.619	5218	7	745.429	0.833908	0.579634
	ECOLI	356.891	6	59.4819	1652.2	7	236.029	0.252011	0.943226

## Sheet: Spearman's test
Inhibition percentage S. aureus
Correlations
			Glicose_intra	S_aureous
Kendall's tau_b	Glicose_intra	Correlation Coefficient	1	-0.108
		Sig. (2-tailed)	.	0.612
		N	14	14
	S_aureous	Correlation Coefficient	-0.108	1
		Sig. (2-tailed)	0.612	.
		N	14	14
Spearman's rho	Glicose_intra	Correlation Coefficient	1	-0.132
		Sig. (2-tailed)	.	0.654
		N	14	14
	S_aureous	Correlation Coefficient	-0.132	1
		Sig. (2-tailed)	0.654	.
		N	14	14
Inhibition percentage E.coli
Correlations
			Glicose_intra	E_coli
Kendall's tau_b	Glicose_intra	Correlation Coefficient	1	-0.106
		Sig. (2-tailed)	.	0.638
		N	14	14
	E_coli	Correlation Coefficient	-0.106	1
		Sig. (2-tailed)	0.638	.
		N	14	14
Spearman's rho	Glicose_intra	Correlation Coefficient	1	-0.141
		Sig. (2-tailed)	.	0.632
		N	14	14
	E_coli	Correlation Coefficient	-0.141	1
		Sig. (2-tailed)	0.632	.
		N	14	14
Inhibition percentage Salmonella
Correlations
			Glicose_intra	Samonela
Kendall's tau_b	Glicose_intra	Correlation Coefficient	1	-0.094
		Sig. (2-tailed)	.	0.675
		N	14	14
	Samonela	Correlation Coefficient	-0.094	1
		Sig. (2-tailed)	0.675	.
		N	14	14
Spearman's rho	Glicose_intra	Correlation Coefficient	1	-0.122
		Sig. (2-tailed)	.	0.678
		N	14	14
	Samonela	Correlation Coefficient	-0.122	1
		Sig. (2-tailed)	0.678	.
		N	14	14
Inhibition halo S. aureus
Correlations
			Glicose_Intra_H	S_aureous_H
Kendall's tau_b	Glicose_Intra_H	Correlation Coefficient	1	-0.194
		Sig. (2-tailed)	.	0.384
		N	14	14
	S_aureous_H	Correlation Coefficient	-0.194	1
		Sig. (2-tailed)	0.384	.
		N	14	14
Spearman's rho	Glicose_Intra_H	Correlation Coefficient	1	-0.264
		Sig. (2-tailed)	.	0.362
		N	14	14
	S_aureous_H	Correlation Coefficient	-0.264	1
		Sig. (2-tailed)	0.362	.
		N	14	14
Inhibition halo E.coli
Correlations
			Glicose_Intra_H	E_coli_H
Kendall's tau_b	Glicose_Intra_H	Correlation Coefficient	1	-0.026
		Sig. (2-tailed)	.	0.906
		N	14	14
	E_coli_H	Correlation Coefficient	-0.026	1
		Sig. (2-tailed)	0.906	.
		N	14	14
Spearman's rho	Glicose_Intra_H	Correlation Coefficient	1	-0.047
		Sig. (2-tailed)	.	0.874
		N	14	14
	E_coli_H	Correlation Coefficient	-0.047	1
		Sig. (2-tailed)	0.874	.
		N	14	14
Inhibition halo Salmonella
Correlations
			Glicose_Intra_H	Samonela_H
Kendall's tau_b	Glicose_Intra_H	Correlation Coefficient	1	-0.042
		Sig. (2-tailed)	.	0.855
		N	14	14
	Samonela_H	Correlation Coefficient	-0.042	1
		Sig. (2-tailed)	0.855	.
		N	14	14
Spearman's rho	Glicose_Intra_H	Correlation Coefficient	1	-0.062
		Sig. (2-tailed)	.	0.834
		N	14	14
	Samonela_H	Correlation Coefficient	-0.062	1
		Sig. (2-tailed)	0.834	.
		N	14	14
